# Supplementary material for: Photoselective Protective Netting Improves “Honeycrisp” Fruit Quality
Source: MDPI journal article supplement (doi:10.3390/plants9121708), 2020-12-04
Supplement: s1 [file s1]

**Table S1:** Yield (kg), trunk cross-sectional area (TCSA) (cm<sup>2</sup>), and crop load (fruit cm<sup>-2</sup> TCSA) ( $\pm$  SEM) for trees under blue, red, or pearl netting compared to an uncovered control (Control) in 2015 and 2016. Letters denote differences determined using a post hoc Tukey's test ( $\alpha = 0.05$ ).

| Treatment       | Yield (kg)        | TCSA (cm <sup>2</sup> ) | Crop Load<br>(Fruit cm <sup>-2</sup> TCSA) |
|-----------------|-------------------|-------------------------|--------------------------------------------|
| <b>2015</b>     |                   |                         |                                            |
| Blue            | 4.01 $\pm$ 0.17 a | 3.93 $\pm$ 0.04 a       | 4.94 $\pm$ 0.48 a                          |
| Red             | 4.30 $\pm$ 0.61 a | 4.01 $\pm$ 0.03 a       | 4.66 $\pm$ 0.27 a                          |
| Pearl           | 4.54 $\pm$ 0.38 a | 4.02 $\pm$ 0.07 a       | 5.09 $\pm$ 0.37 a                          |
| Control         | 5.29 $\pm$ 1.27 a | 4.03 $\pm$ 0.05 a       | 5.51 $\pm$ 0.78 a                          |
| <i>p</i> -Value | 0.65              | 0.50                    | 0.77                                       |
| <b>2016</b>     |                   |                         |                                            |
| Blue            | 2.79 $\pm$ 0.61 a | 5.14 $\pm$ 0.54 a       | 1.34 $\pm$ 0.32 a                          |
| Red             | 5.22 $\pm$ 0.96 a | 5.20 $\pm$ 0.42 a       | 2.42 $\pm$ 0.45 a                          |
| Pearl           | 5.09 $\pm$ 0.50 a | 5.46 $\pm$ 0.36 a       | 2.27 $\pm$ 0.21 a                          |
| Control         | 3.22 $\pm$ 0.91 a | 4.68 $\pm$ 0.17 a       | 1.72 $\pm$ 0.49 a                          |
| <i>p</i> -Value | 0.07              | 0.57                    | 0.18                                       |

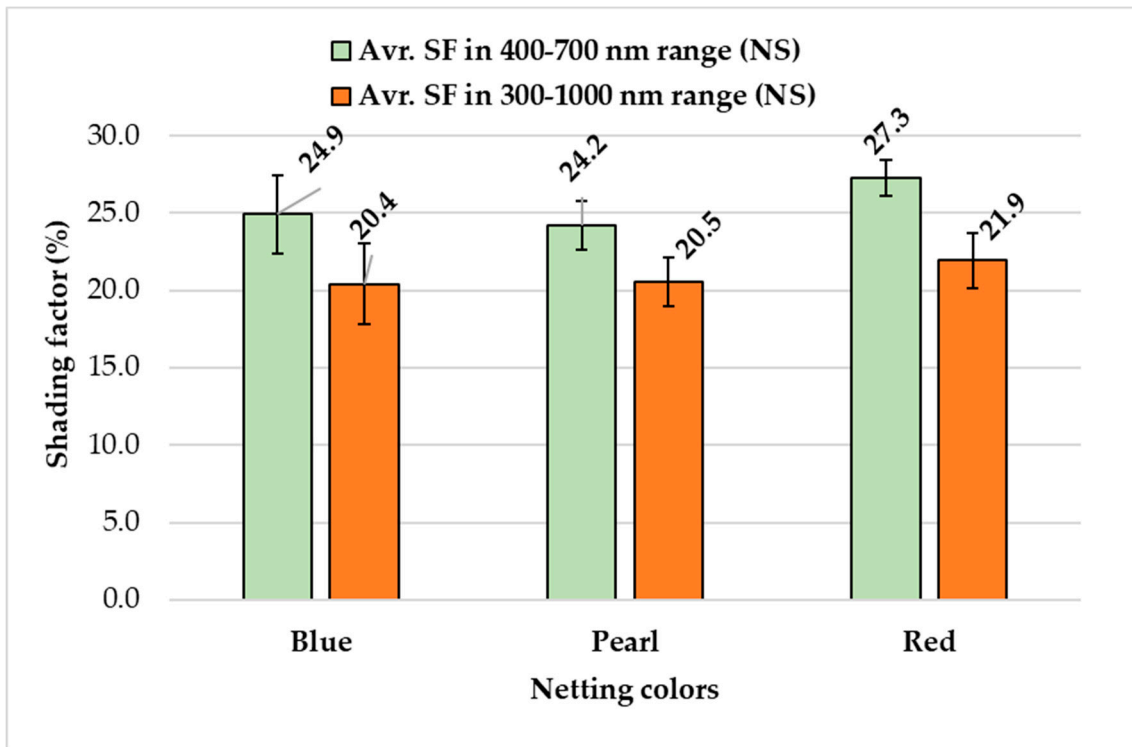

**Figure S1: Shading factor (SF, %) by the three colored nets used in this trial in a Honeycrisp in Quincy (WA) in 2015-2016.** Average values of shading factor were obtained by the measurements of transmittance from the full measured spectrum (300 nm to 1000 nm) and in the range 400 nm to 700 nm (PAR). Shading factor (%) is calculated following the formula shading factor (%) = 100% light – transmittance (%) equal to the portion of light Figure 2016. (N=4, no August). NS is indicating no statistical difference ( $p>0.05$ ).

**Table 2.** Effect of photosensitive colored nets in modifying the light underneath and summary of physiological responses variation under nets (trees or fruit) based on parameters measured in this study in Quincy commercial block (WA) of ‘Honeycrisp’ in 2015-2016. Letters populating the last 4 columns on the right come from the statistical analysis mean discriminations reported in the results, Section 3, (same letters means no difference between the four treatments, and each line is an independent statistical analysis). Comparisons are allowed only along each row not between rows.

| Parameters Measured in this Study            | Year        | Target of Response               | Control Un-netted trt (Used as Reference) | Pearl Net (response under) | Red Net (Response Under) | Blue Net (Response Under) |
|----------------------------------------------|-------------|----------------------------------|-------------------------------------------|----------------------------|--------------------------|---------------------------|
| Shading Factor (300 nm-1000 nm, %)           | Avr 4M 2016 | net                              | N/A                                       | 20.5 (a)                   | 21.9 (a)                 | 20.4 (a)                  |
| PAR ( $\mu\text{mol m}^{-2} \text{s}^{-1}$ ) | 2016        | Total full light under net       | a                                         | b                          | b                        | b                         |
| PAR ( $\mu\text{mol m}^{-2} \text{s}^{-1}$ ) | 2016        | <i>Scattered light under net</i> | ab                                        | a                          | b                        | b                         |
| UV ( $\mu\text{mol m}^{-2} \text{s}^{-1}$ )  | 2016        | Total full light under net       | a                                         | b                          | b                        | b                         |
| UV ( $\mu\text{mol m}^{-2} \text{s}^{-1}$ )  | 2016        | <i>Scattered light under net</i> | a                                         | b                          | b                        | b                         |
| Blue/Red ratio                               | 2016        | Total full light under net       | b                                         | c                          | d                        | a                         |
| Blue/Red ratio                               | 2016        | <i>Scattered light under net</i> | a                                         | b                          | c                        | a                         |
| Red/ Far red                                 | 2016        | Total full light under net       | a                                         | c                          | c                        | b                         |
| Red/ Far red                                 | 2016        | <i>Scattered light under net</i> | a                                         | c                          | c                        | b                         |
| PAR/UV ratio                                 | 2016        | Total full light under net       | a                                         | a                          | a                        | a                         |
| PAR/UV ratio                                 | 2016        | <i>Scattered light under net</i> | d                                         | a                          | b                        | c                         |
| Light interception                           | July 2015   | trees                            | b                                         | a                          | a                        | a                         |
| Light interception                           | Avr 3M 2016 | trees                            | b                                         | a                          | a                        | a                         |
| Sunburn-free/minimal incidence               | 2015        | apples                           | d                                         | c                          | b                        | a                         |
| Sunburn-free/minimal incidence               | 2016        | apples                           | d                                         | c                          | b                        | a                         |

|                                |                       |        |    |   |    |    |
|--------------------------------|-----------------------|--------|----|---|----|----|
| Poor Red overcolor (<25%)      | 2015                  | apples | c  | b | b  | a  |
| Poor Red overcolor (<25%)      | 2016                  | apples | c  | a | b  | b  |
| Bitter Pit-free incidence      | 2015 (harvest)        | apples | c  | c | a  | b  |
| Bitter Pit-free incidence      | 2016 (harvest)        | apples | c  | c | a  | b  |
| Bitter Pit-free incidence      | 2015 (4M postharvest) | apples | bc | c | ab | a  |
| Bitter Pit-free incidence      | 2016 (4M postharvest) | apples | b  | a | a  | a  |
| Average fruit weight (g)       | 2015 (harvest)        | apples | b  | a | ab | b  |
| Average fruit weight (g)       | 2016 (harvest)        | apples | a  | a | a  | a  |
| Firmness (kg/cm <sup>2</sup> ) | 2015 (harvest)        | apples | a  | a | a  | a  |
| Firmness (kg/cm <sup>2</sup> ) | 2016 (harvest)        | apples | a  | a | a  | a  |
| SSC/TA ratio                   | 2015 (harvest)        | apples | a  | a | a  | a  |
| SSC/TA ratio                   | 2016 (harvest)        | apples | a  | b | a  | ab |
